# Supplementary material for: Microstructures and deformation mechanisms in Opalinus Clay: insights from scaly clay from the Main Fault in the Mont Terri Rock Laboratory (CH)
Source: Copernicus journal article supplement (doi:10.5194/se-8-27-2017), 2017-01-10
Supplement: Supplementary file [file se-8-27-2017-supplement-title-page.pdf › se-8-27-2017-supplement-title-page.pdf]

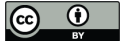

## *Supplement of*

# **Microstructures and deformation mechanisms in Opalinus Clay: insights from scaly clay from the Main Fault in the Mont Terri Rock Laboratory (CH)**

**Ben Laurich et al.**

*Correspondence to:* Ben Laurich (ben.laurich@bgr.de)

- se-8-27-2017-supplement-title-page.pdf
- BFS1-SC1\_240816.xlsm
- BPS12-SC1\_240816.xlsm

The copyright of individual parts of the supplement might differ from the CC-BY 3.0 licence.
